# Supplementary material for: Nano-particle vaccination combined with TLR-7 and -9 ligands triggers memory and effector CD8+ T-cell responses in melanoma patients
Source: PubMed Central journal article supplement (PMC3549564; doi:10.1002/eji.201142361), 2012-07-18
Supplement: eji0042-3049-SD1.pdf [file eji0042-3049-SD1.pdf]

# European Journal of Immunology

**Supporting Information**

**for**

**DOI 10.1002/eji.201142361**

Simone M. Goldinger, Reinhard Dummer, Petra Baumgaertner,  
Daniela Mihic-Probst, Katrin Schwarz, Anya Hammann-Haenni, Joerg Willers,  
Christine Geldhof, John O. Prior, Thomas M. Kündig, Olivier Michielin,  
Martin F. Bachmann and Daniel E. Speiser

**Nano-particle vaccination combined with TLR-7 and -9 ligands triggers memory  
and effector CD8<sup>+</sup> T-cell responses in melanoma patients**

Supporting Information Table 1. **Baseline Characteristics of Patients**

|                                 | Patient | Gender | Age [yrs] | Height <sup>a)</sup> [cm] | Weight <sup>a)</sup> [kg] | Melanoma Stage <sup>a)</sup> |
|---------------------------------|---------|--------|-----------|---------------------------|---------------------------|------------------------------|
| <b>Group I:<br/>IFA</b>         | 1001    | male   | 82        | 170                       | 72.0                      | III                          |
|                                 | 1002    | male   | 44        | 169                       | 64.6                      | IV                           |
|                                 | 1003    | female | 62        | 158                       | 72.0                      | III                          |
|                                 | 1004    | female | 29        | 185                       | 68.0                      | III                          |
|                                 | 1005    | male   | 72        | 185                       | 65.0                      | III                          |
| <b>Group II:<br/>IFA</b>        | 1006    | male   | 46        | 180                       | 75.0                      | III                          |
|                                 | 1007    | female | 47        | 157                       | 79.0                      | III                          |
|                                 | 1008    | male   | 64        | 170                       | 79.0                      | III                          |
|                                 | 1009    | male   | 58        | 181                       | 86.0                      | III                          |
|                                 | 1010    | male   | 26        | 172                       | 61.2                      | IV                           |
|                                 | 1011    | male   | 53        | 171                       | 75.0                      | III                          |
| <b>Group III:<br/>Imiquimod</b> | 2001    | male   | 61        | 175                       | 104.0                     | III                          |
|                                 | 2002    | male   | 61        | 175                       | 92.8                      | III                          |
|                                 | 2003    | male   | 56        | 174                       | 89.2                      | III                          |
|                                 | 2004    | female | 69        | 163                       | 58.2                      | III                          |
|                                 | 2005    | female | 56        | 168                       | 55.0                      | III                          |
| <b>Group IV:<br/>intranodal</b> | 2006    | female | 61        | 164                       | 77.7                      | III                          |
|                                 | 2007    | female | 44        | 164                       | 77.4                      | III                          |
|                                 | 2008    | male   | 55        | 186                       | 103.1                     | III                          |
|                                 | 2009    | female | 63        | 161                       | 73.2                      | III                          |
|                                 | 2010    | male   | 57        | 174                       | 80.1                      | III                          |

<sup>a)</sup> Assesed at screening.

Mean ( $\pm$  SD) patient age for patient groups I, II, III and IV was  $58 \pm 19$ ,  $49 \pm 12$ ,  $61 \pm 5$  and  $56 \pm 7$  years, respectively.

Supporting Information Table 2. **Overview of Results**

|                              | Patient | Melan-A specific T cells [%] |                                          | Anti-Melan-A antibodies [ELISA titer] |          | Anti-Qb antibodies [ELISA titer] |           | Melan-A expression [%] |                   | HLA class I expression [%] |                   | Disease status at study end | Lymphadenopathy <sup>b)</sup> |
|------------------------------|---------|------------------------------|------------------------------------------|---------------------------------------|----------|----------------------------------|-----------|------------------------|-------------------|----------------------------|-------------------|-----------------------------|-------------------------------|
|                              |         | Before vaccination           | Highest level after start of vaccination | Visit 1                               | Visit 12 | Visit 1                          | Visit 12  | Before vaccination     | After vaccination | Before vaccination         | After vaccination |                             |                               |
| Group I:<br>IFA              | 1001    | 0.17                         | 0.46 <sup>a)</sup>                       | 281                                   | 26'470   | < 1'000                          | 1'050'000 | -                      | -                 | -                          | -                 | -                           |                               |
|                              | 1002    | 0.01                         | 0.25 <sup>a)</sup>                       | 21                                    | -        | < 1'000                          | -         | 80                     | 80                | 10                         | 10                | PD                          | √                             |
|                              | 1003    | 0.06                         | 0.18 <sup>a)</sup>                       | 10                                    | 10'627   | < 1'000                          | 697'845   | 90                     | 90                | 90                         | 40                | PD                          |                               |
|                              | 1004    | 0.18                         | 0.36 <sup>a)</sup>                       | 57                                    | 43'977   | < 1'000                          | 1'370'000 | -                      | -                 | -                          | -                 | -                           |                               |
|                              | 1005    | 0.01                         | 0.04 <sup>a)</sup>                       | 14                                    | 5'742    | < 1'000                          | 174'107   | -                      | -                 | -                          | -                 | -                           |                               |
| Group II:<br>IFA + Imiquimod | 1006    | 0.03                         | 0.16 <sup>a)</sup>                       | 25                                    | 16'511   | < 1'000                          | 452'528   | 100                    | 70                | 40                         | 30                | -                           |                               |
|                              | 1007    | 0.09                         | 0.23 <sup>a)</sup>                       | 96                                    | 44'780   | < 1'000                          | 1'630'000 | 60                     | 10                | 30                         | 0                 | -                           | √                             |
|                              | 1008    | 0.01                         | 0.10 <sup>a)</sup>                       | 20                                    | 5'486    | < 1'000                          | 533'984   | -                      | -                 | -                          | -                 | -                           |                               |
|                              | 1009    | 0.05                         | 0.37 <sup>a)</sup>                       | 52                                    | -        | < 1'000                          | -         | -                      | -                 | -                          | -                 | PD                          |                               |
|                              | 1010    | 0.08                         | 0.18 <sup>a)</sup>                       | 225                                   | 23'531   | < 1'000                          | 610'473   | -                      | -                 | -                          | -                 | PD                          |                               |
|                              | 1011    | 0.03                         | 0.19 <sup>a)</sup>                       | 28                                    | 8'245    | < 1'000                          | 476'915   | -                      | -                 | -                          | -                 | -                           |                               |
| Group III:<br>Imiquimod      | 2001    | 0.04                         | 0.05                                     | 9                                     | 2'273    | < 1'000                          | 228'223   | 80                     | 10                | 80                         | 30                | PD                          | √                             |
|                              | 2002    | 0.06                         | 0.07                                     | -                                     | 1'097    | -                                | 14'852    | -                      | -                 | -                          | -                 | SD                          | √                             |
|                              | 2003    | 0.04                         | 0.05                                     | 8                                     | -        | < 1'000                          | -         | 90                     | 90                | 50                         | 30                | PD                          |                               |
|                              | 2004    | 0.04                         | 0.11 <sup>a)</sup>                       | 116                                   | 9'587    | < 1'000                          | 204'271   | 90                     | 40                | 80                         | 80                | SD                          | √                             |
|                              | 2005    | 0.03                         | 0.18 <sup>a)</sup>                       | 30                                    | -        | < 1'000                          | -         | -                      | -                 | -                          | -                 | PD                          | √                             |
| Group IV:<br>intranodal      | 2006    | 0.08                         | 0.16 <sup>a)</sup>                       | 36                                    | 736      | < 1'000                          | 23'520    | -                      | -                 | -                          | -                 | SD                          |                               |
|                              | 2007    | 0.04                         | 0.05                                     | 26                                    | 278      | < 1'000                          | 5'817     | -                      | -                 | -                          | -                 | PD                          |                               |
|                              | 2008    | 0.03                         | 0.24 <sup>a)</sup>                       | -                                     | 6'216    | -                                | 35'725    | -                      | -                 | -                          | -                 | SD                          | √                             |
|                              | 2009    | 0.11                         | 0.25 <sup>a)</sup>                       | 12                                    | 1'827    | < 1'000                          | 34'598    | -                      | -                 | -                          | -                 | SD                          | √                             |
|                              | 2010    | 0.04                         | 0.06                                     | 19                                    | 2'733    | < 1'000                          | 135'929   | 90                     | 0                 | 50                         | 40                | PD                          | √                             |

<sup>a)</sup> Considered as an immune responder. Linear regression analysis of all 21 patients showed that their age did not correlate with their frequencies of Melan-A specific T cells (R square = 0.002605, P = 0.83).

<sup>b)</sup> Defined as clinically palpable and/or radiologically enlarged

PD: Progressive disease; SD: Stable disease

Supporting Information Figure 1

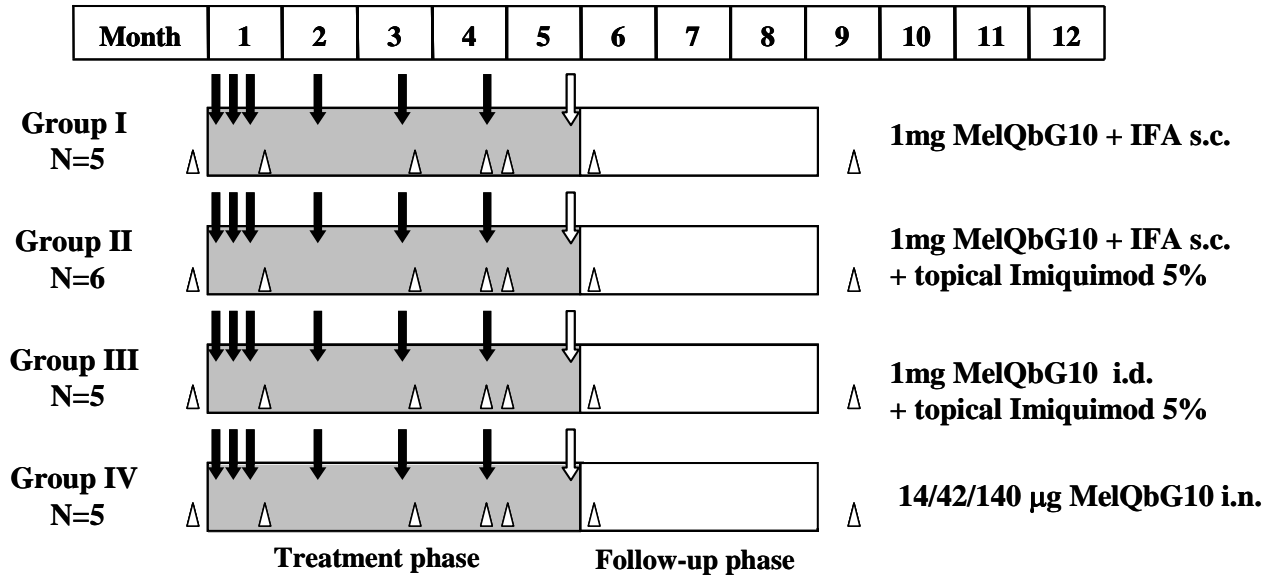

T-cell analysis with PBMCs    
 injection with 1mg Melan-A/MART-1 peptide + IFA s.c.

**Trial Design.** Four groups of patients received vaccinations as indicated on the right side of the figure. For each patient, the total trial duration was approximately 9 months. The screening period took up to 4 weeks. The treatment phase, including the seven injections with MelQbG10, lasted 18 weeks and the follow-up phase ended after 36 weeks. All s.c. and i.d. injections were performed in the upper arm left or right alternatively. Injections with IFA were prepared by mixing equal volumes of MelQbG10 with IFA until the two liquids formed a homogenous emulsion. The intranodal injections were performed always in the same inguinal lymph node region. The lymph node dissected region was omitted for vaccine injections. No immunosuppressive medication was used during the study.

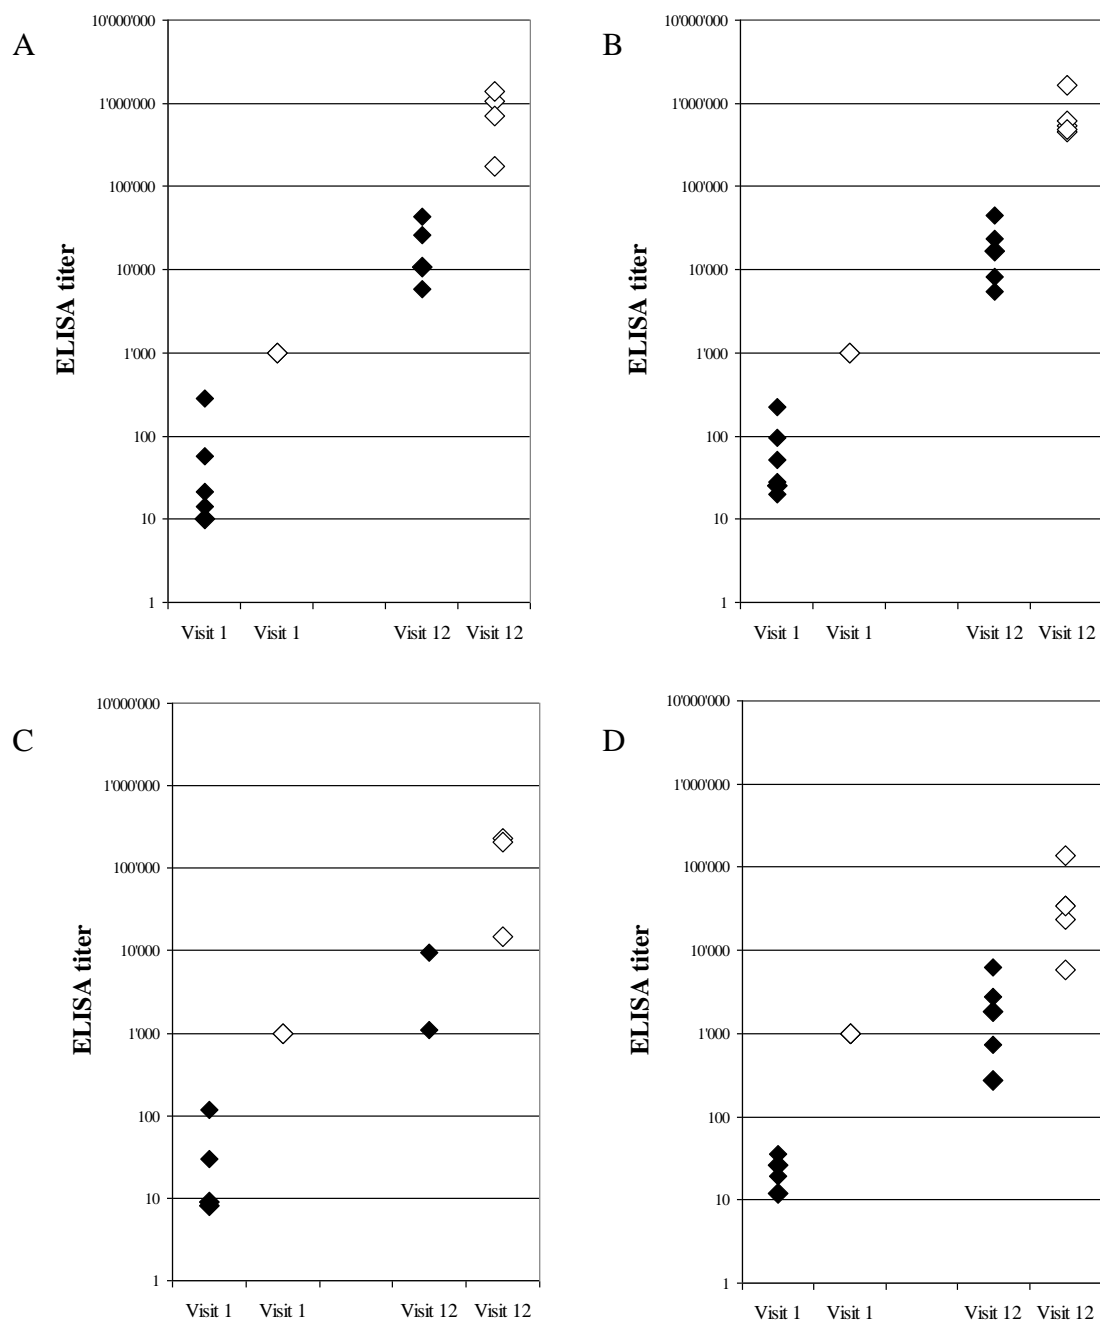

**Anti-Melan-A and anti-Qb IgG Antibody responses.** Geometric mean titers are expressed as reciprocal serum dilutions giving half-optical density in ELISA. Before vaccination (Visit 1) and at study end (Visit 12) anti-Melan A (◆) and anti-Qb (◇) titers were measured in patients' blood serum samples. **Panel A** shows the titers of group I (1mg MelQbG10 + IFA s.c.), **Panel B** of group II (1mg MelQbG10 + IFA s.c. + Imiquimod 5%), **Panel C** of group III (1mg MelQbG10 i.d.+ Imiquimod 5%), and **Panel D** of group IV (14/42/140mg MelQbG10 i.n.). Mann-Whitney pair wise comparisons were performed. The contrasts of Group I and II vs. Group III and IV were statistically significant for anti-Melan-A and anti-Qb titers ( $p=0.003$  and  $p=0.001$ , respectively).

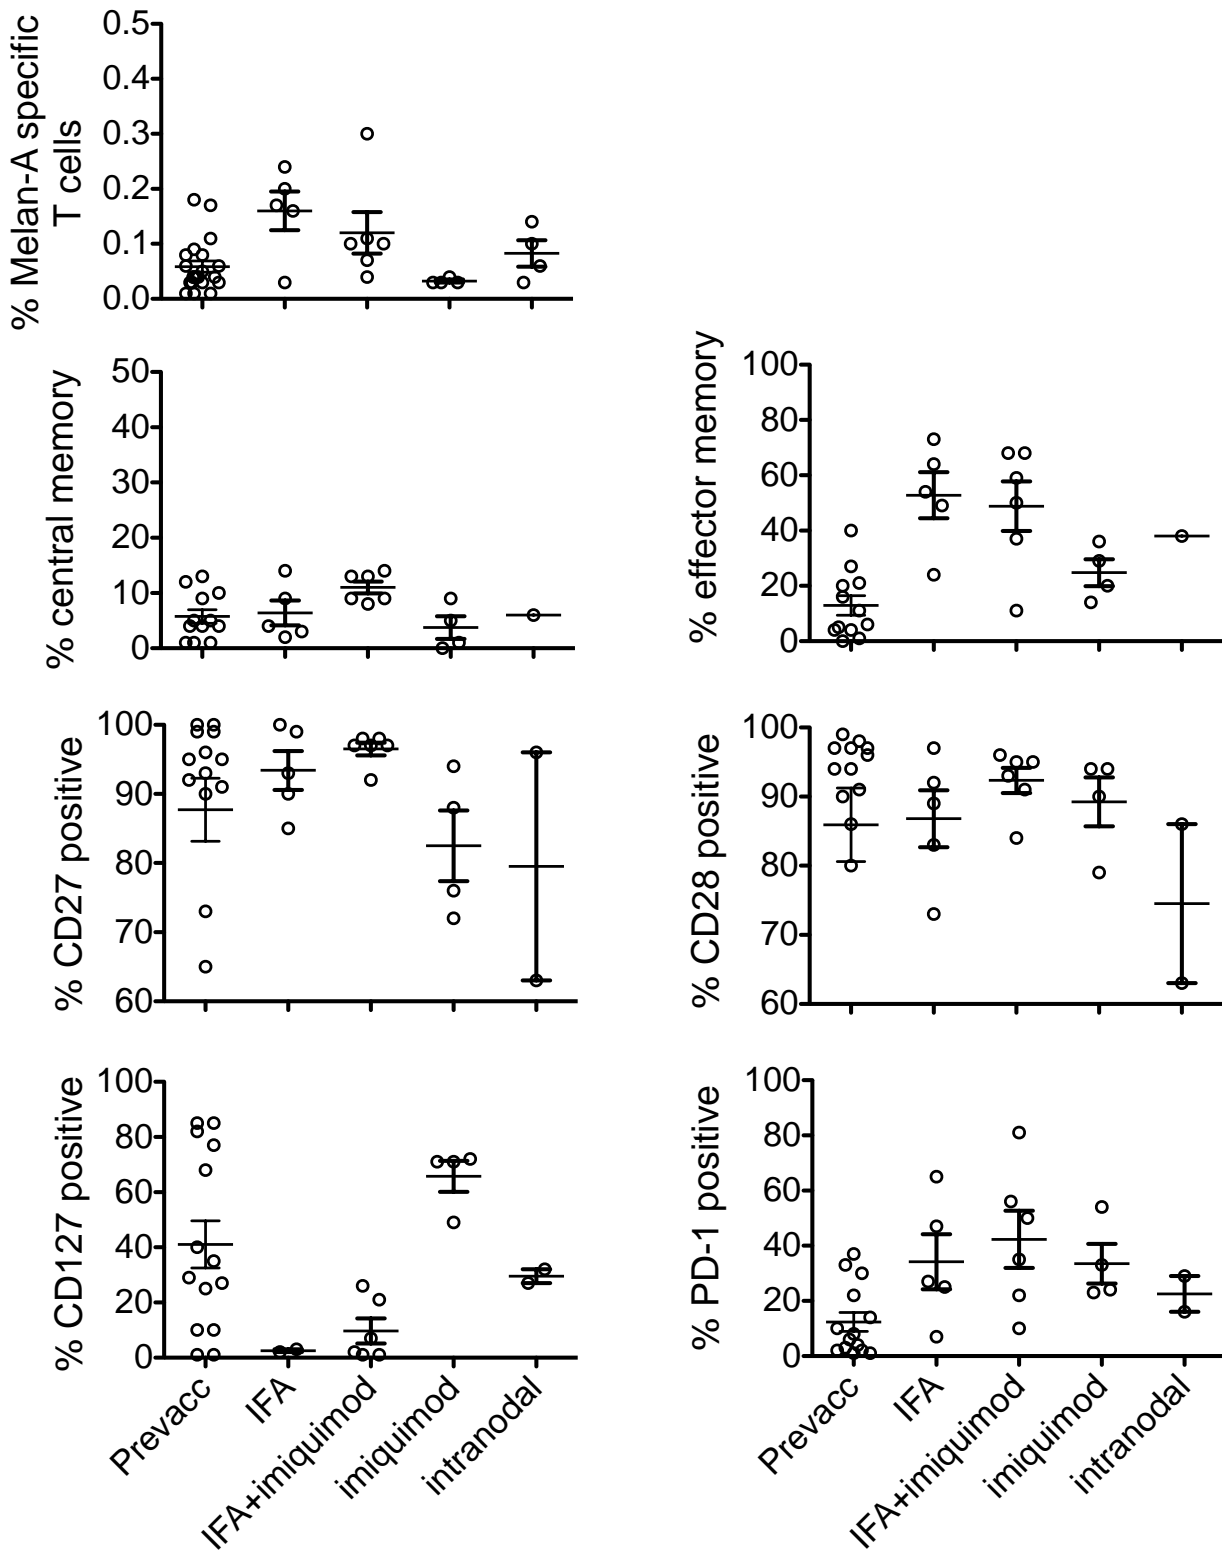

**Frequency and memory- / effector-phenotypes of Melan-A specific T cells.** Results before vaccination (Prevacc) and of a single time point after vaccination with MelQbG10 (six vaccinations), from the same experiments as those for Figures 2 and 3, shown in a similar fashion. Statistical significances have been determined by the Mann-Whitney test. Where significant, P-values are symbolized with \*\* or \* for <0.01 or 0.01-0.049, respectively.
